# Supplementary material for: The impact of myocardial compressibility on organ-level simulations of the normal and infarcted heart
Source: PubMed Central journal article supplement (PMC8242073; doi:10.1038/s41598-021-92810-y), 2021-06-29
Supplement: 41598_2021_92810_MOESM2_ESM.pdf [file 41598_2021_92810_MOESM2_ESM.pdf]

# The Impact of Myocardial Compressibility on Organ-Level Simulations of the Normal and Infarcted Heart

Hao Liu<sup>1,+</sup>, Joao S. Soares<sup>2,+</sup>, John Walmsley<sup>1</sup>, David S. Li<sup>1</sup>, Samarth Raut<sup>1</sup>, Reza Avazmohammadi<sup>3</sup>, Paul Iaizzo<sup>4</sup>, Mark Palmer<sup>6</sup>, Joseph H. Gorman III<sup>5</sup>, Robert C. Gorman<sup>5</sup>, and Michael S. Sacks<sup>1,\*</sup>

1 James T. Willerson Center for Cardiovascular Modeling and Simulation, The University of Texas at Austin, Austin, TX, USA

2 Engineered Tissue Multiscale Mechanics and Modeling Laboratory, Virginia Commonwealth University, Richmond, VA, USA

3 Computational Cardiovascular Bioengineering Lab, Texas A&M University, College Station, TX, USA

4 Visible Heart Lab, University of Minnesota Twin Cities, Minneapolis, MN, USA

5 Gorman Cardiovascular Research Group, University of Pennsylvania, Philadelphia, PA, USA

6 Corporate Core Technologies, Medtronic, Inc.

\* msacks@oden.utexas.edu

+Both authors contributed equally to this work

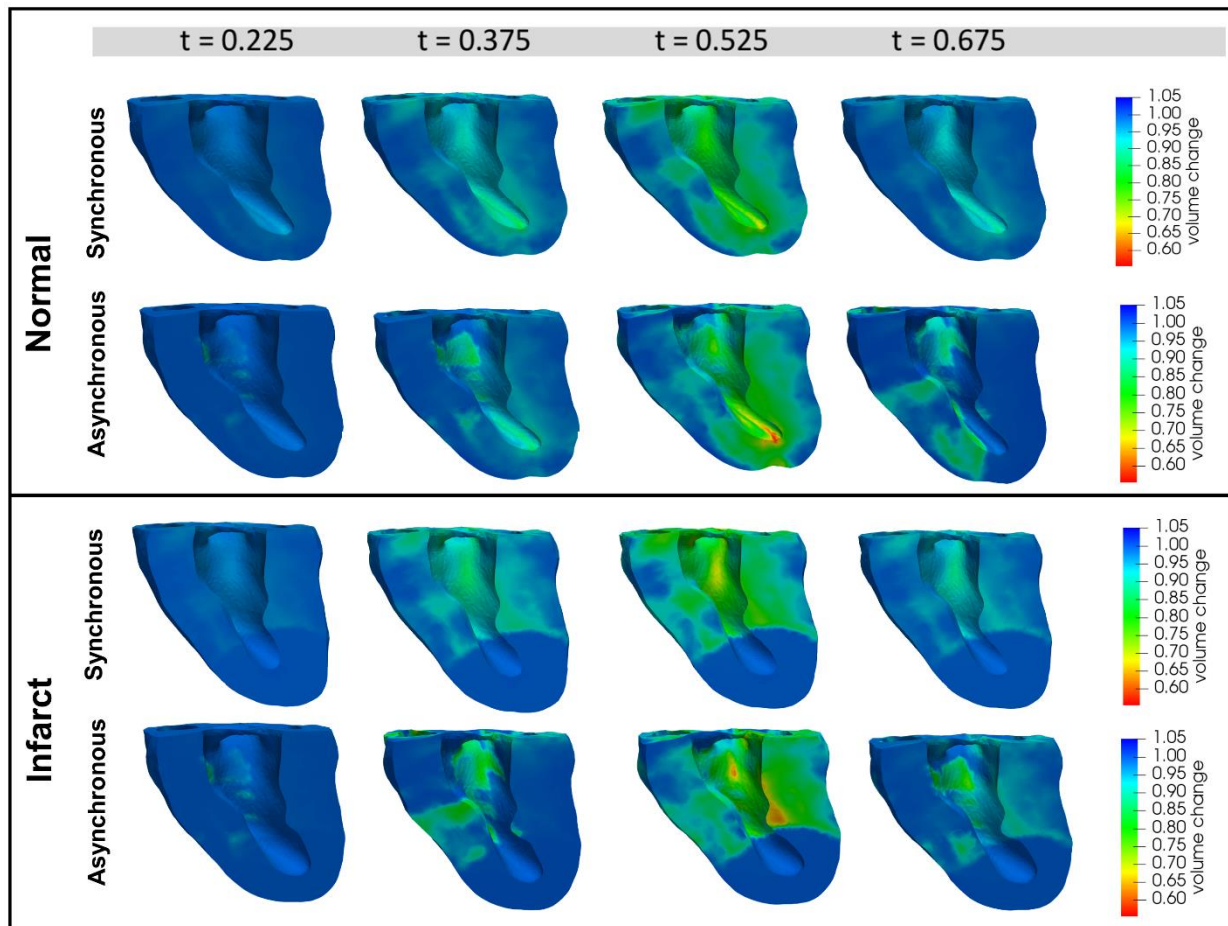

**Figure S1.** Comparisons of volume reduction in one cardiac cycle between synchronous and asynchronous cases in both normal and infarct in-silico heart models
